# Supplementary material for: Trace Fe3+ mediated synthesis of LiFePO4 micro/nanostructures towards improved electrochemical performance for lithium-ion batteries
Source: Royal Society of Chemistry journal article supplement (doi:10.1039/c5ra22373c), 2015-12-03
Supplement: c5ra22373c1.pdf [file c5ra22373c1.pdf]

## Supporting information

### **Trace Fe<sup>3+</sup> mediated synthesis of micro/nano structures LiFePO<sub>4</sub> towards electrochemical performance for Lithium-ion Batteries**

Lei Hu,<sup>a</sup> Tianwen Zhang,<sup>a</sup> Jianwen Liang,<sup>a</sup> Yongchun Zhu,<sup>\*a</sup> Kailong Zhang<sup>a</sup> and Yitai Qian<sup>\*ab</sup>

<sup>a</sup>Hefei National Laboratory for Physical Science at Micro-scale, Department of Chemistry, University of Science and Technology of China, Hefei, Anhui 230026, P. R. China. E-mail: ychzhu@ustc.edu.cn, ytqian@ustc.edu.cn; Tel: +86-551-63601589

<sup>b</sup>School of Chemistry and Chemical Engineering, Shandong University, Jinan, 250100, P. R. China. E-mail: ytqian@ustc.edu.cn; Tel: +86-551-63607234

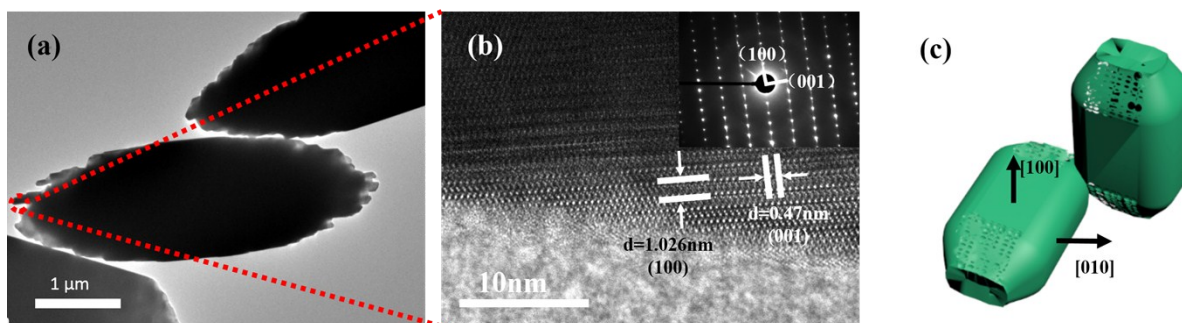

**Fig. S1.** (a) The TEM image of LFP-4 (b) The SAED pattern and HRTEM image of the side location of bulk  $\text{LiFePO}_4$  (c) Schematic illustration of LFP-4

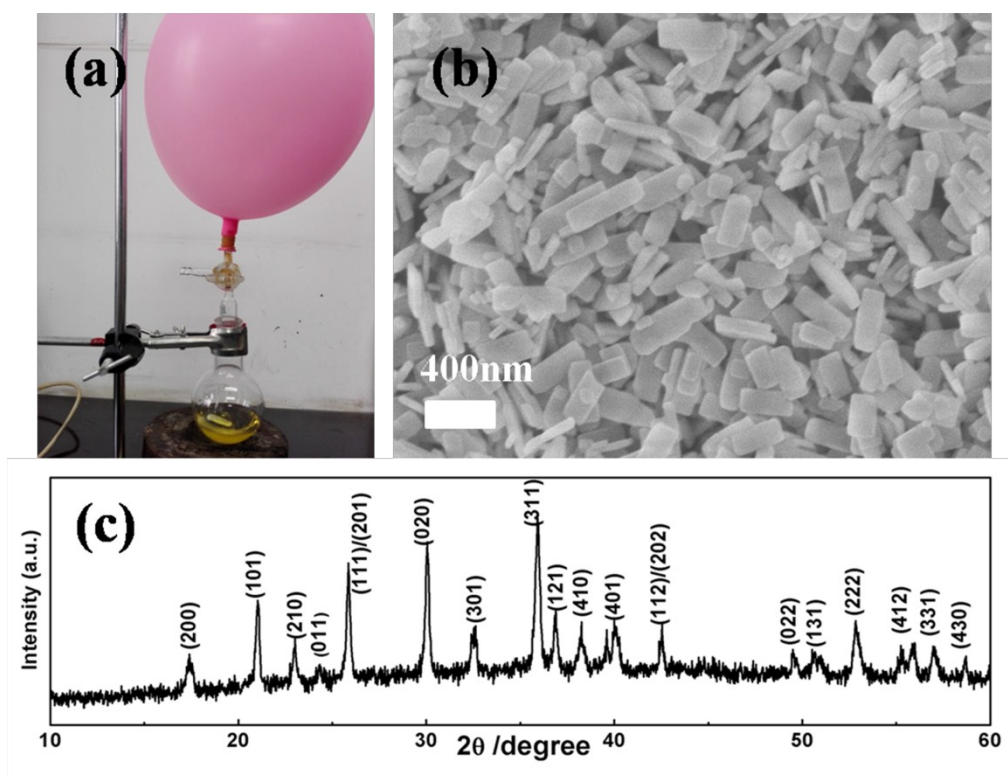

**Fig. S2** (a) The equipments of  $\text{FeSO}_4$ -EG solution stirred under an inert circumstance. (b) SEM images of LFP-5 (c) XRD patterns of the samples

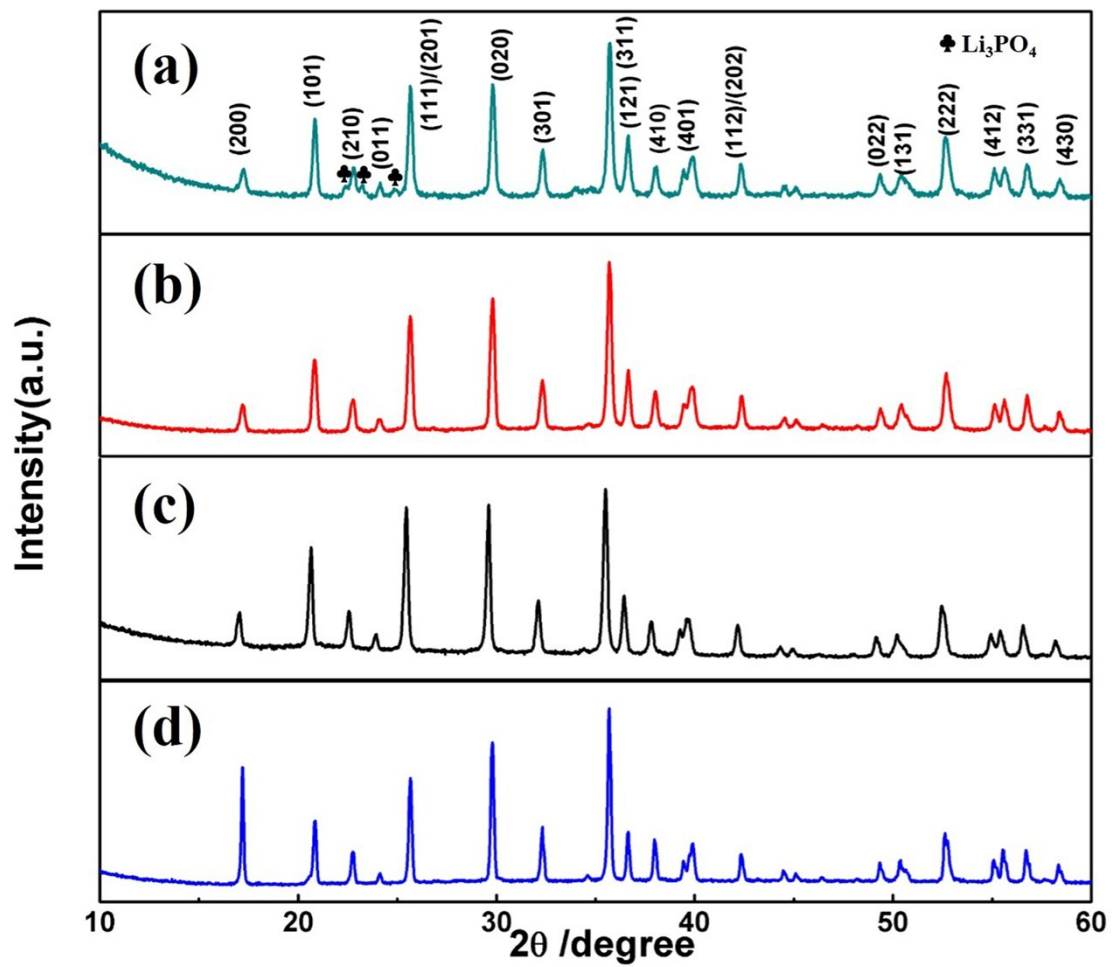

Fig. S3. XRD patterns of the samples: (a) LFP-1A (b) LFP-2A (c) LFP-3A and (d) LFP-4A.

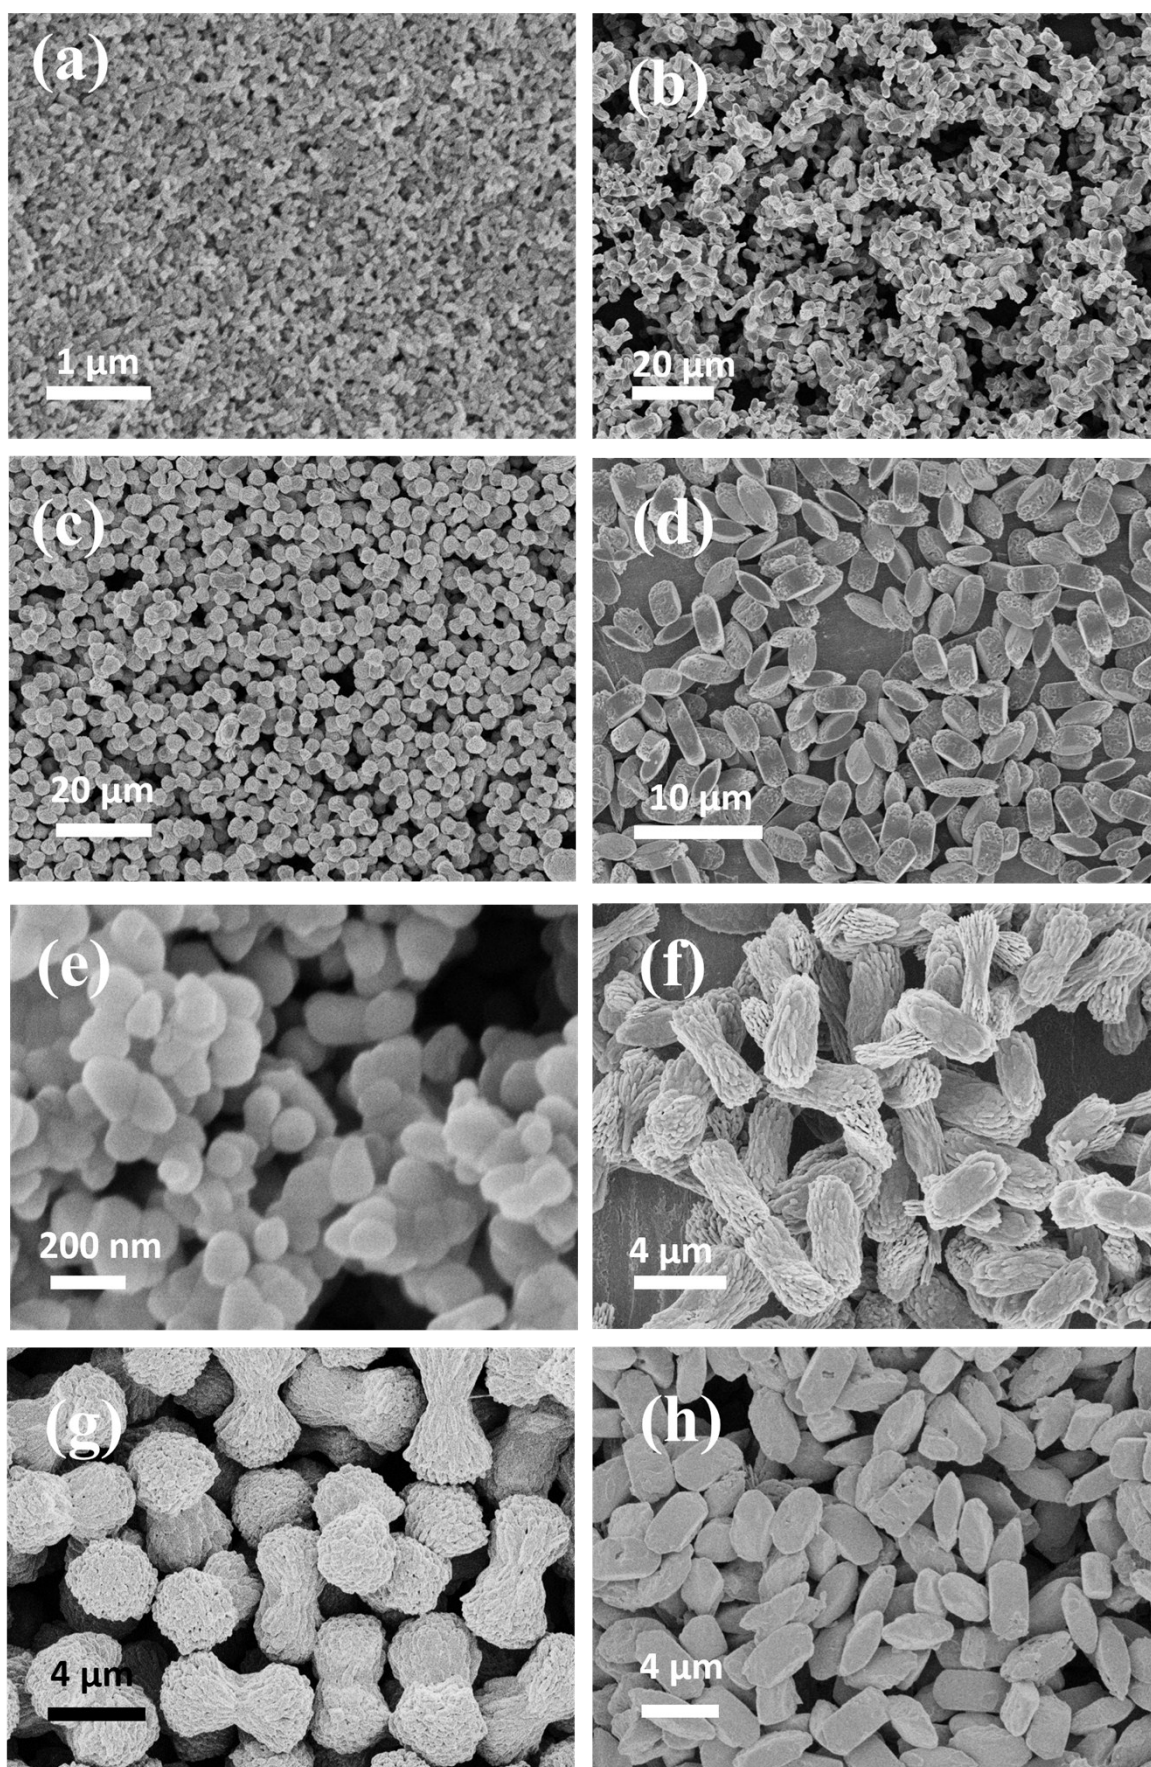

**Fig. S4.** The lower magnification SEM images (a) LFP-1 (b) LFP-2 (c) LFP-3 (d) LFP-4 and carbon coating  $\text{LiFePO}_4$  samples (e) LFP-1A (f) LFP-2A (g) LFP-3A (h) LFP-4A
